# Supplementary material for: New alkoxylphenyl substituted benzo[1,2-b:4,5-b′] dithiophene-based polymers: synthesis and application in solar cells
Source: Royal Society of Chemistry journal article supplement (doi:10.1039/c3ta11968h), 2013-01-01
Supplement: c3ta11968h.pdf [file c3ta11968h.pdf]

# **New alkoxyphenyl substituted benzo[1,2-b:4,5-b'] dithiophene-based polymers: synthesis and application in solar cells**

**Jun Yuan,<sup>‡a</sup> Lu Xiao,<sup>‡a</sup> Bo Liu,<sup>‡ab</sup> Yongfang Li,<sup>c</sup> Yuehui He,<sup>b</sup> Chunyue Pan,<sup>a</sup> Yingping Zou<sup>\*a,d</sup>**

<sup>a</sup> *College of Chemistry and Chemical Engineering, Central South University, Changsha 410083, China E-mail: [yingpingzou@csu.edu.cn](mailto:yingpingzou@csu.edu.cn)(Y.Zou)*

<sup>b</sup> *State key Laboratory for Powder Metallurgy, Central South University, Changsha 410083, China*

<sup>c</sup> *Beijing National Laboratory for Molecular Sciences, Institute of Chemistry, Chinese Academy of Sciences, Beijing 100190, China*

<sup>d</sup> *Key Laboratory of Resources Chemistry of Nonferrous Metals (Central South University), Ministry of Education, Changsha, Hunan 410083, China*

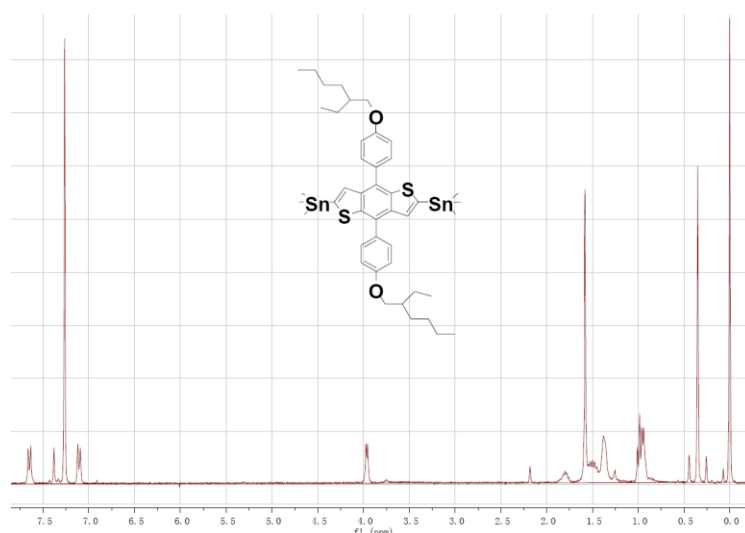

**Fig.S1**  $^1\text{H}$  NMR spectroscopy of the BDTPO monomer

**Table S1:** Optical and Electrochemical Properties of the Synthesized Conjugated Copolymers

| Polymers           | Absorption spectra       |                          |                                  |                                  | Cyclic voltammetry                                  |                                                      |                    |
|--------------------|--------------------------|--------------------------|----------------------------------|----------------------------------|-----------------------------------------------------|------------------------------------------------------|--------------------|
|                    | Sol <sup>a</sup>         |                          | Film <sup>b</sup>                |                                  | <i>p</i> -doping                                    | <i>n</i> -doping                                     | $E_g^{EC}$<br>(eV) |
|                    | $\lambda_{\max}$<br>(nm) | $\lambda_{\max}$<br>(nm) | $\lambda_{\text{onset}}$<br>(nm) | $E_g^{opt}$ <sup>c</sup><br>(eV) | $E_{\text{on}}^{ox}$ /HOMO <sup>d</sup><br>(V)/(eV) | $E_{\text{on}}^{red}$ /LUMO <sup>d</sup><br>(V)/(eV) |                    |
| <b>PBDTPO-DTBO</b> | 575                      | 567                      | 749                              | 1.65                             | 1.16 /-5.56                                         | -0.72 /-3.68                                         | 1.88               |
| <b>PBDTPO-DTBT</b> | 540                      | 556                      | 765                              | 1.62                             | 1.06/-5.46                                          | -0.74/-3.66                                          | 1.80               |

a. Measured in chloroform solution. b. Cast from chloroform solution. c. Bandgap estimated from the onset wavelength of the optical absorption. d. HOMO =  $-e (E_{\text{on}}^{ox} + 4.4)$  (eV); LUMO =  $-e (E_{\text{on}}^{red} + 4.4)$  (eV) using (eV) using Ag/AgCl as the reference electrode.

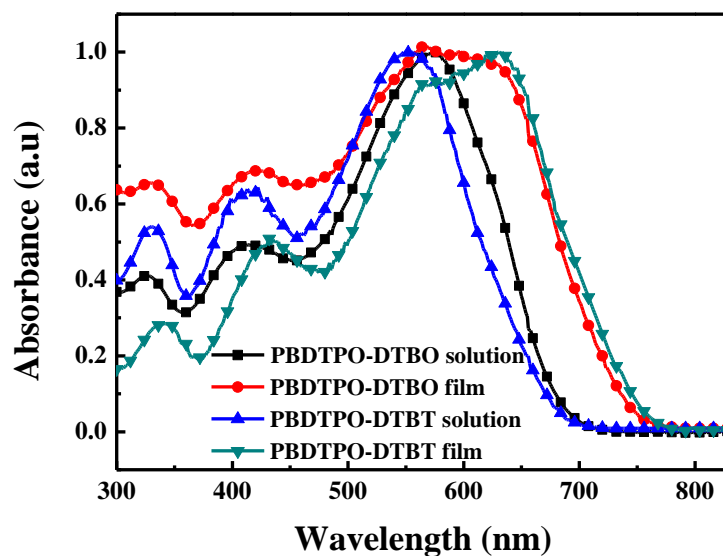

Fig. S2 UV-Vis absorption spectra of PBDTPO-DTBO and PBDTPO-DTBT in  $\text{CHCl}_3$  and films

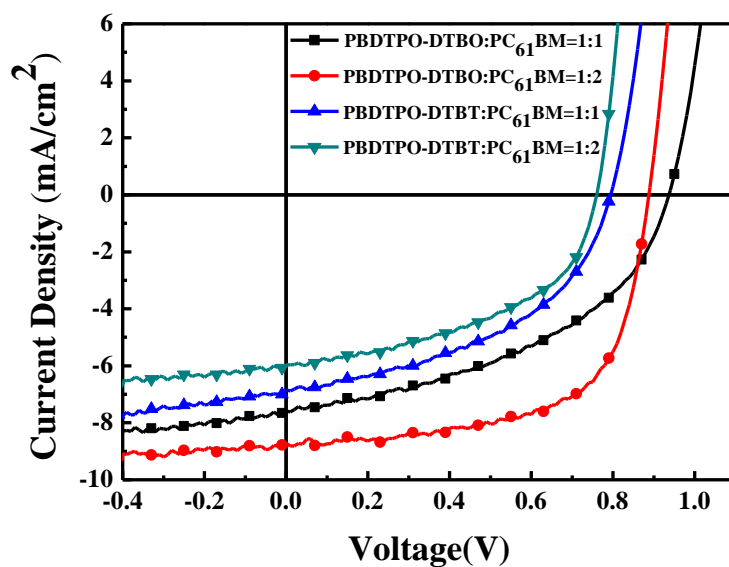

Fig. S3  $J-V$  curves of the PSCs based on PBDTPO-DTBO and PBDTPO-DTBT:  $\text{PC}_{61}\text{BM}$ , under illumination of AM 1.5,  $100 \text{ mW}/\text{cm}^2$ .

**Table S2** Photovoltaic Data of Polymer Solar Cells Based on PBDTPO-DTBO and PBDTPO-DTBT Blended with PC<sub>61</sub>BM

| Active layer                        | V <sub>oc</sub> (V) | J <sub>sc</sub> (mAcm <sup>-2</sup> ) | FF (%) | PCE (%) |
|-------------------------------------|---------------------|---------------------------------------|--------|---------|
| PBDTPO-DTBO:PC <sub>61</sub> BM=1:1 | 0.94                | 7.6                                   | 45     | 3.2     |
| PBDTPO-DTBO:PC <sub>61</sub> BM=1:2 | 0.89                | 8.7                                   | 64     | 5.0     |
| PBDTPO-DTBT:PC <sub>61</sub> BM=1:1 | 0.79                | 6.9                                   | 47     | 2.6     |
| PBDTPO-DTBT:PC <sub>61</sub> BM=1:2 | 0.76                | 6.0                                   | 48     | 2.2     |

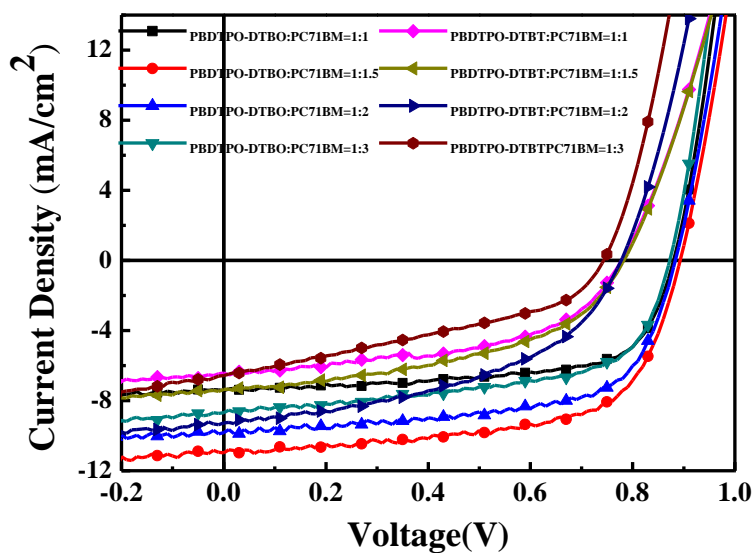

**Fig.S4** *J-V* curves of the PSCs based on polymers: PC<sub>71</sub>BM, under illumination of AM 1.5, 100 mW/cm<sup>2</sup>.

**Table S3:** Photovoltaic Data of the Polymer Solar Cells Based on PBDTPO-DTBO and PBDTPO-DTBT Blended with PC<sub>71</sub>BM

| Active layer                          | V <sub>oc</sub> (V) | J <sub>sc</sub> (mAcm <sup>-2</sup> ) | FF (%) | PCE (%) |
|---------------------------------------|---------------------|---------------------------------------|--------|---------|
| PBDTPO-DTBO:PC <sub>71</sub> BM=1:1   | 0.90                | 9.5                                   | 56     | 4.8     |
| PBDTPO-DTBO:PC <sub>71</sub> BM=1:1.5 | 0.89                | 11                                    | 64     | 6.2     |
| PBDTPO-DTBO:PC <sub>71</sub> BM=1:2   | 0.88                | 9.8                                   | 65     | 5.6     |
| PBDTPO-DTBO:PC <sub>71</sub> BM=1:3   | 0.87                | 8.7                                   | 59     | 4.5     |
| PBDTPO-DTBT:PC <sub>71</sub> BM=1:1   | 0.78                | 6.4                                   | 51     | 2.6     |
| PBDTPO-DTBT:PC <sub>71</sub> BM=1:1.5 | 0.78                | 7.4                                   | 48     | 2.8     |
| PBDTPO-DTBT:PC <sub>71</sub> BM=1:2   | 0.78                | 9.3                                   | 47     | 3.4     |
| PBDTPO-DTBT:PC <sub>71</sub> BM=1:3   | 0.74                | 6.6                                   | 38     | 1.8     |

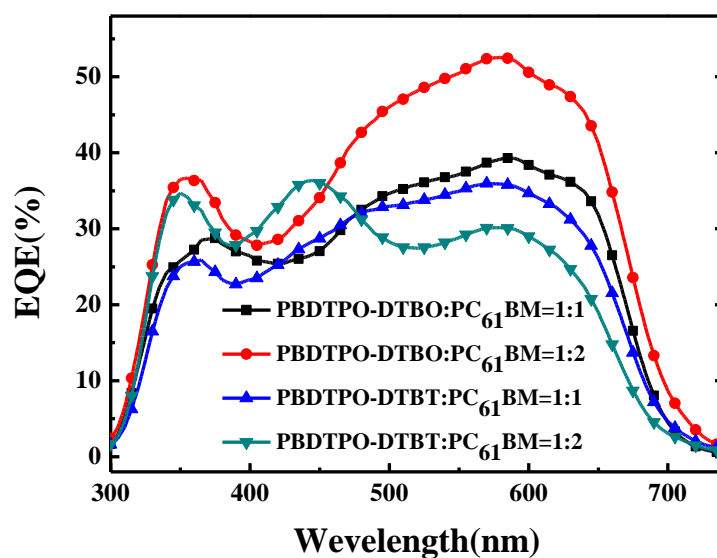

**Fig.S5** EQE spectra of PSCs based on PBDTPO-DTBO and PBDTPO-DTBT: PC<sub>61</sub>BM (1:1 and 1:2, w/w).

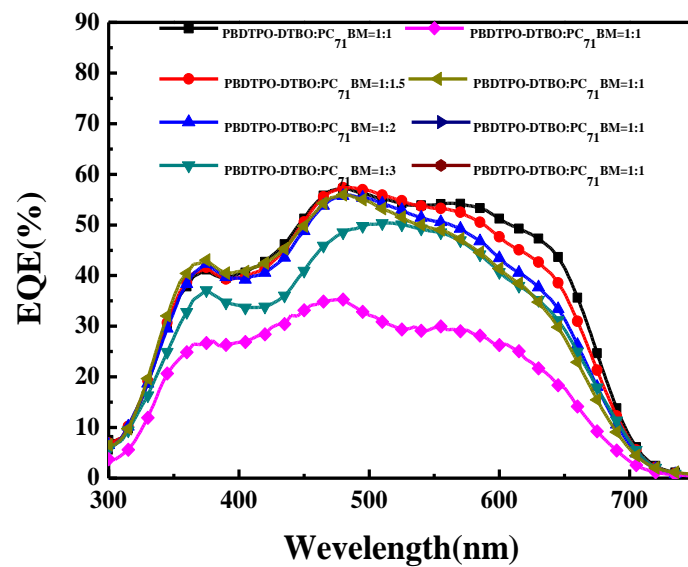

**Fig.S6** EQE spectra of PSCs based on PBDTPO-DTBO and PBDTPO-DTBT: PC<sub>71</sub>BM (1:1, 1:1.5, 1:2, and 1:3 w/w).
